# Supplementary material for: Novel hydrophobic polyvinyl alcohol–formaldehyde foams for organic solvents absorption and effective separation
Source: Royal Society of Chemistry journal article supplement (doi:10.1039/c3ra43907k), 2013-10-29
Supplement: c3ra43907k.pdf [file c3ra43907k.pdf]

## Supplementary information

*Yanxiong Pan,<sup>a,b</sup> Weicai Wang,<sup>a,b</sup> Chao Peng,<sup>a</sup> Kai Shi,<sup>a</sup> Yunxia Luo,<sup>a</sup> Xiangling Ji<sup>\*a</sup>*

<sup>a</sup> State Key Laboratory of Polymer Physics and Chemistry, Changchun Institute of Applied Chemistry, Chinese Academy of Sciences, Changchun 130022, PR of China

<sup>b</sup> State Key Laboratory of Polymer Physics and Chemistry, Changchun Institute of Applied Chemistry, Chinese Academy of Sciences, University of the Chinese Academy of Sciences, Changchun 130022, PR of China

E-mail: [xlji@ciac.jl.cn](mailto:xlji@ciac.jl.cn)

Telephone: 86-431-85262876

## The $^1\text{H}$ NMR of PVF

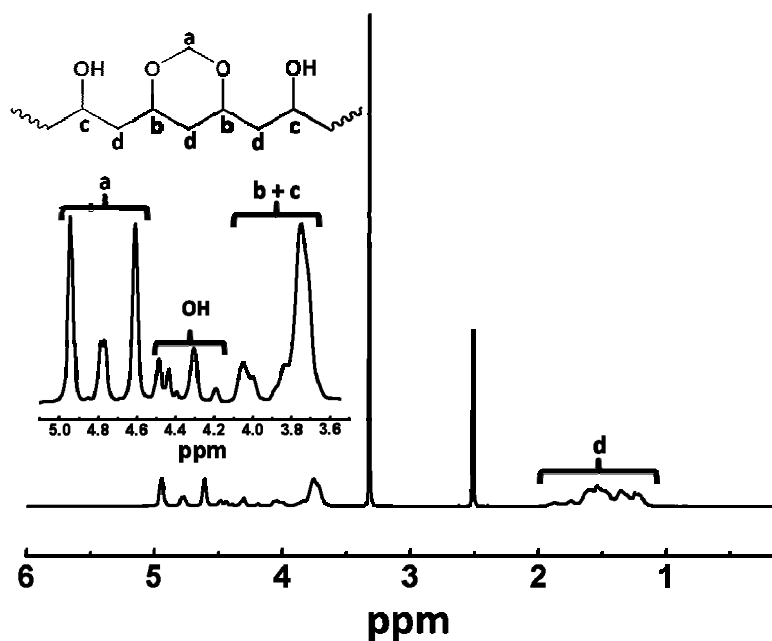

Fig S1.  $^1\text{H}$  NMR spectra of PVF in  $d^6$ -DMSO

The degree of acetalization (DA) of PVF is calculated from the

formulas<sup>1</sup>:

$$\text{DA} = \frac{A_a}{A_b + A_c} \times 100\%$$

or

$$= \frac{A_a}{A_a + A_{\text{OH}}} \times 100\%$$

Here,  $A_a$ ,  $A_b$ ,  $A_c$  and  $A_{\text{OH}}$  is the integral area of the corresponding signal in Fig S1.

1. I. Pollers, P. Adriaensens, R. Carleer, D. Vanderzande and J. Gelan, *Macromolecules*, 1996, **29**, 5875-5881.
